# Supplementary material
Source: Elsevier journal article supplement (https://www.sciencedirect.com/science/article/pii/S2666506920300201)
Supplement: mmc1 [file S2666506920300201:mmc1.docx]

**Traducción al español y propuesta de modificación de la clasificación de lesiones deportivas *Orchard Sports Injury Classification System* (OSICS) Versión 12**

RESUMEN

**Objetivo:** dar a conocer la traducción al español de la Versión 12 del sistema de clasificación de lesiones deportivas denominado *Orchard Sports Injury Classification System* y proponer una modificación del mismo para incluir un código numérico que refleje la repercusión de la lesión en la funcionalidad deportiva.

**Método:** los miembros del grupo de trabajo sobre la epidemiología de la lesión deportiva, del Grupo de Estudio del Sistema Músculo-Tendón, de la Sociedad Española de Traumatología del Deporte, llevaron a cabo una revisión bibliográfica sobre los sistemas de clasificación epidemiológica de las lesiones, tres reuniones presenciales de consenso y diversos trabajos en línea, siguiendo la metodología de trabajo DELPHI.

**Resultados:** La traducción al español de la versión 12 del sistema *Orchard Sports Injury Classification System* está accesible de forma completa y gratuita en:

<https://gesmute.es/traduccion-espanola-osics-12/>

Se propone añadir, al final de la codificación actual de la versión 12, un código numérico (0: Sin afectación Funcional; 1: Limita Actividad Deportiva; 2: Impide Actividad Deportiva; 3: Limita Actividades Vida Cotidiana), para indicar la repercusión funcional que produce la lesión.

**Conclusiones:** presentamos la traducción al español de la versión 12 del sistema de clasificación de lesiones *Orchard Sports Injury Classification System*. Proponemos como mejora la inclusión de criterios de funcionalidad en las clasificaciones de lesiones deportivas, nuestra propuesta podría suponer una mejora al *Orchard Sports Injury Classification System* versión 12.

Palabras Clave: Lesión Deporte, Clasificación, Epidemiología, *Orchard Sports Injury Classification System*, Código Funcional.

**Translation into Spanish and proposal to modify the Orchard Sports Injury Classification System (OSICS) Version 12**

ABSTRACT

**Objective:** to publicize the Spanish translation of Version 12 of the sports injury classification system called Orchard Sports Injury Classification System and to propose a modification to include a numerical code that reflects the impact of the injury on sports functionality.

**Method:** the members of the working group on the epidemiology of sports injury, of the Study Group of the Muscle-Tendon System, of the Spanish Society of Sports Traumatology, carried out a bibliographic review on the epidemiological classification systems of injuries, three face-to-face consensus meetings and various online works, following the DELPHI work methodology.

**Results:** The Spanish translation of version 12 of the Orchard Sports Injury Classification System is accessible completely and free of charge at:

<https://gesmute.es/traduccion-espanola-osics-12/>

It is proposed to add, at the end of the current coding of version 12, a numerical code (0: No Functional impairment; 1: Limits Sports Activity; 2: Prevents Sports Activity; 3: Limits Daily Life Activities), to indicate the functional repercussion that produces the injury.

**Conclusions:** We present the Spanish translation of version 12 of the Orchard Sports Injury Classification System. We propose as an improvement the inclusion of functionality criteria in sports injury classifications, our proposal could be an improvement to the Orchard Sports Injury Classification System version 12.

Key Words: Sports Injury, Classification, Epidemiology, Orchard Sports Injury Classification System, Functional Code.

**Introducción**

El Grupo de Estudio del Sistema Músculo y Tendón (GESMUTE) está compuesto por especialistas de diferentes disciplinas, afiliados a la Sociedad Española de Traumatología del Deporte (SETRADE). Dentro de GESMUTE, el grupo de trabajo de epidemiología ha analizado los sistemas de clasificación de las lesiones deportivas que se utilizan habitualmente1-4, con la finalidad de valorar las ventajas e inconvenientes de cada uno de los sistemas existentes y proponer a GESMUTE uno de ellos para ser utilizado en sus trabajos.

Existen muchas clasificaciones (Tabla 1) y una de las más utilizadas es la creada en 1992 por el Dr. Orchard denominada *Orchard Sports Injury Classification System* (OSICS)1. Existe una versión 12 (OSICS-12) en inglés, aunque la versión más reciente traducida al español es la 101,5-7.

<<<Tabla 1>>>

Los diversos sistemas propuestos1,2,4,9 se basan habitualmente en un formulario de recogida de datos relacionados con la lesión o el accidente deportivo y una base de datos donde se recopilan para, mediante su posterior análisis y estudio:

1. Proponer medidas preventivas.

2. Optimizar las reglas de juego de cada deporte.

3. Planificar adecuadamente la asistencia sanitaria de los diversos eventos deportivos. Pese a que estos sistemas son útiles para realizar estudios epidemiológicos y proporcionar soporte asistencial, no están exentos de limitaciones (Tabla 2)1,4,6,7,9, lo que ha determinado intentos de mejora7,8,10 (Tabla 2) y promovido la publicación de consensos para solucionar discrepancias9.

<<<Tabla 2>>>

Ante esta situación, en la reunión de GESMUTE celebrada en Madrid el 22 de septiembre de 2018, se acordó analizar los diferentes sistemas de codificación epidemiológica de las lesiones deportivas, con el fin de elegir uno de ellos, para ser utilizado en lo sucesivo por el grupo. En este trabajo se describen los resultados de este análisis y los acuerdos adoptados.

**Método**

Utilizando la metodología DELPHI11 (trabajo y consenso en línea y reuniones de grupo) los componentes del grupo de epidemiología de GESMUTE, han realizado, en las fechas indicadas, las siguientes actividades:

- Del 1 de septiembre al 20 de septiembre de 2018: consenso sobre tareas a realizar por el grupo.

- 22 de septiembre de 2018: Acuerdo por GESMUTE para analizar y revisar los sistemas de clasificación de lesiones para proponer el uso de uno de ellos en los trabajos de GESMUTE.

- Del 23 de septiembre de 2018 al 30 de marzo de 2019, revisión bibliográfica y análisis de los diferentes sistemas de clasificación epidemiológica de las lesiones deportivas.

- 30 de marzo de 2019: Acuerdo por consenso de los asistentes para que GESMUTE utilice en lo sucesivo la clasificación OSICS-12, en sus estudios y proponer añadir un código relacionado con la afectación funcional que produce la lesión.

- Del 30 de marzo de 2019 al 11 de noviembre de 2019, contacto con Dr. Orchard para conseguir autorización para la traducción del sistema OSICS-12 al español, y elaboración del consenso sobre propuestas a tratar en la reunión de GESMUTE del 23 de noviembre de 2019.

- 23 de noviembre de 2019: Aprobación de la propuesta de modificación del sistema OSICS-12, añadiendo un código funcional a la misma en la reunión del grupo GESMUTE.

- Del 25 de noviembre al 15 de diciembre consenso sobre metodología de trabajo para la traducción de OSICS-12 y traducción de la misma.

- Del 15 de diciembre de 2019 al 30 de enero de 2020, resolución de discrepancias y consenso sobre traducciones realizadas de OSICS-12.

- Del 13 de enero de 2020 al 20 de enero de 2020, contacto e incorporación al grupo de especialistas en medicina del deporte de Iberoamérica (Chile, Argentina, Uruguay y México) para elaborar la traducción iberoamericana de OSICS-12.

- Del 30 de enero de 2020 al 5 de marzo de 2020, finalización del consenso de traducción de OSICS-12.

Las reuniones de grupo han sido celebradas en Madrid, en la Clínica CEMTRO, los días 22 de septiembre de 2018, 30 de marzo de 2019 y 23 de noviembre de 2019.

**Resultados**

Se han traducido al español los 1733 diagnósticos, 41 categorías lesionales y 13 áreas corporales que componen el OSICS-12. Esta traducción es accesible de forma gratuita y el texto completo, en formato hoja de cálculo, se puede consultar en:

<https://gesmute.es/traduccion-espanola-osics-12/>

Las principales decisiones tomadas por consenso de todos los componentes de GESMUTE en las reuniones celebradas han sido:

- Utilización por parte de GESMUTE del sistema OSICS de codificación de las lesiones deportivas, para los estudios epidemiológicos de nuestro grupo.

- Traducción al español de OSICS-12.

- Agrupar la patología descrita en la tabla por regiones anatómicas. Consideramos que la agrupación lesional por regiones topográficas contribuía a un uso más eficiente de este sistema de clasificación.

- Propuesta de una modificación del sistema OSICS-12 consistente en añadir, a la codificación propuesta actualmente un código numérico para indicar la correspondiente afectación funcional que produce la lesión (Tabla 3).

<<<Tabla 3>>>

Además, se han iniciado los trabajos para validar la traducción al español de OSICS-12 tanto en España como en Iberoamérica.

**Discusión**

Los principales resultados de nuestro trabajo han sido la adopción del sistema OSICS por GESMUTE y la traducción al español del sistema OSICS-12, cuyo texto completo puede ser consultado de forma gratuita y a texto completo, en formato de hoja de cálculo, en:

<https://gesmute.es/category/publicaciones/>

Además, se ha elaborado una propuesta de mejora del sistema OSICS para añadir en la codificación de las lesiones un dígito final indicativo de la repercusión funcional de la lesión en la práctica deportiva.

El sistema OSICS-12 está estructurado en cuatro caracteres asignados a cada lesión1,2,5,6,. El primero de estos caracteres se relaciona con la localización anatómica, el segundo se corresponde con el tejido específico lesionado o con la patología de la lesión, el tercer y cuarto caracteres describen la patología o amplían el diagnóstico. Este sistema1,5,7 está en constante revisión, es flexible para adaptar o incluir nuevas categorías y conceptos sin invalidar las versiones previas y es lo suficientemente amplio para abarcar las diferentes lesiones. Desde que fue publicado, sus autores renunciaron a los derechos del *copyright*, ha sido validado2, se ha demostrado su aplicabilidad7 y es ampliamente utilizado en el ámbito de la epidemiología de la lesión deportiva1,5,12. El gran número de publicaciones en las que se emplea este sistema, se atribuye a que proporciona una codificación precisa y a que las sucesivas modificaciones, proporcionan versiones mejoradas. El sistema OSICS ha evolucionado a lo largo del tiempo, incorporando codificaciones y categorías que permiten incluir anomalías estructurales, patologías de deportistas discapacitados, lesiones pediátricas, estados postquirúrgicos, patologías médicas, actuaciones administrativas o sobre deportistas no enfermos1,5,7 y ha sido traducido a diversos idiomas, entre ellos el español5,6.

La clasificación de una lesión, implica describirla, establecer sus categorías y su severidad13.

Teniendo en cuenta estas consideraciones, la taxonomía debe13-20:

- Ser reproducible.
- Establecer diferencias netas entre las categorías.
- Ser fácil de recordar.
- Ser concisa y fácilmente entendible.
- Incluir variables pronósticas.

No obstante, el sistema OSICS pierde precisión cuando la codificación se realiza por personal no sanitario2 y han sido propuestas variaciones para poder valorar las recaídas de las lesiones (*Subsequent injury categorization* -SIC- *Model*)10.

La investigación de las lesiones deportivas necesita de una codificación adecuada de las diferentes patologías con el fin de poder conocer su verdadera incidencia, su localización precisa, los mecanismos de lesión, las medidas preventivas efectivas, la eficacia de los diversos tratamientos aplicados a una misma lesión1,2,5,9,12 o el acierto en las decisiones para la vuelta a la competición. No obstante, una misma lesión puede repercutir de forma diferente en la actividad deportiva, de manera que, por ejemplo, a una paratendinopatía aquílea (Código OSICS-12: ATAP) se le asigna el mismo código, sea ésta totalmente invalidante para el deportista o le permita entrenar con normalidad. Si pretendemos analizar la eficacia de diversos tratamientos o seleccionar el tipo de ejercicio que podemos aplicar en el tratamiento de esta lesión, es muy importante conocer la repercusión funcional de dicha lesión en la actividad deportiva. Por estos motivos, desde el grupo de trabajo de epidemiología de GESMUTE, añadimos un código numérico final, para indicar la repercusión funcional que produce la lesión. A modo de ejemplo, una paratendinopatía aquílea que no impida la realización de actividad física al deportista, es decir, sin afectación funcional la codificaríamos como ATAP-0, mientras que esa misma entidad, cuando produzca dolor que impida la práctica deportiva, la denominaríamos como ATAP-2. Esta codificación puede ser útil para el protocolo de tratamiento que apliquemos a la lesión, ya que en el abordaje de una paratendinopatía aquílea sin afectación funcional (ATAP-0) podremos utilizar ejercicios excéntricos y pliométricos casi sin limitación, mientras que en una paratendinopatía aquílea con afectación funcional 2 (ATAP-2) estarían desaconsejados estos mismos ejercicios, favoreciendo el trabajo colaborativo de las diferentes profesiones vinculadas a la medicina del deporte, dentro de los procesos de diagnóstico, tratamiento, rehabilitación y prevención de lesiones. Por estos motivos consideramos aconsejable añadir un último dígito en la codificación OSICS-12 que haga referencia a la repercusión funcional de cada lesión.

Como trabajos futuros nos planteamos la validación de la traducción al español del OSICS-12, tanto en España como en Iberoamérica y la traducción al español de futuras versiones del OSICS. Además, desde GESMUTE se está implementando una aplicación para facilitar la codificación de las lesiones mediante el OSICS-12.

**Bibliografía**

1. Orchard J, Rae K, Brooks J, Hägglund M, Til L, Wales D, et al. Revision, uptake and coding issues related to the open access Orchard Sports Injury Classification System (OSICS) versions 8, 9 and 10.1. Open Access J Sports Med. 2010;1:2017-14.

<https://doi.org/10.2147/OAJSM.S7715>

2. Finch CF, Orchard JW, Twomey DM, Saas Saleem M, Ekegren CL, Lloyd DG, et al. Coding OSICS sports injury diagnoses in epidemiological studies: does the background of the coder matter? Br J Sports Med. 2014;48:552-6.

<https://doi.org/10.1136/bjsports-2012-091219>

3. Kerr ZY, Dompier TP, Snook EM, Marshall SW, Klossner D, Hainline B et al. National Collegiate Athletic Association Injury Surveillance System: review of methods for 2004-2005 through 2013-2014 data collection. J Ath Train. 2014;49(4):552-60.

<https://doi.org/10.4085/1062-6050-49.3.58>

4. Ekegren CL, Gabbe BJ, Finch CF. Sports injury surveillance systems: a review of methods and data quality. Sports Med. 2016;46(1):49-65.

<https://doi.org/10.1007/s40279-015-0410-z>

5. Til-Pérez L, Orchard J, Rae K. El sistema de clasificación y codificación OSICS-10 traducido del inglés. Apunts Med Esport. 2008;43(159):109-12.

<https://www.apunts.org/en-el-sistema-clasificacion-codificacion-osics-10-articulo-X0213371708263891>

6.- Til-Pérez L. Aclaraciones a la traducción del sistema de clasificación y codificación OSICS-10. Apunts Med Esport. 2008;43(159):154-7.

<https://www.apunts.org/es-aclaraciones-traduccion-del-sistema-clasificacion-articulo-X0213371708263981>

7. Crossway AK, Games KE, Eberman LE, Fleming N. Orchard Sports Injury Classification System 10.1 Plus: An End-User Study. Int J Exerc Sci. 2017;10(2):284-93.

<https://www.ncbi.nlm.nih.gov/pmc/articles/PMC5360368/>

8. Finch CF, Staines C. Guidance for sports injury surveillance: the 20-year influence of the Australian Sports Injury Data Dictionary. Inj Prev. 2018;24(5):372-80.

<https://doi.org/10.1136/injuryprev-2017-042580>

9. Bahr R, Clarsen B, Derman W, Dvorak J, Emery CA, Finch CF, et al. International Olympic Committee consensus statement: methods for recording and reporting of epidemiological data on injury and illness in sport 2020 (including STROBE Extension for Sport Injury and Illness Surveillance (STROBE-SIIS)). Br J Sports Med 2020;0:1–18. (In press).

<https://bjsm.bmj.com/content/54/7/372.citation-tools>

10. Finch CF, Cook J. Categorising sports injuries in epidemiological studies: the subsequent injury categorisation (SIC) model to address multiple, recurrent and exacerbation of injuries. Br J Sports Med. 2014;48:1276-80.

<https://bjsm.bmj.com/content/48/17/1276>

11. Reguant-Álvarez M, Torrado-Fonseca M. El método Delphi. REIRE. 2016;9(1):87-102.

<https://doi.org/10.1344/reire2016.9.1916//>

12. Altarriba-Bartes A, Drobnic F, Til L, Malliaropoulos N, Bruno Montoro J, Irurtia A. Epidemiology of injuries in elite taekwondo athletes: two Olympic periods cross-sectional retrospective study. BMJ Open. 2014;4:e004605.

<https://bmjopen.bmj.com/content/4/2/e004605>

13. Hamilton B, Alonso JM, Best TM. Time for a paradigm shift in the classification of muscle injuries. J Sport Health Sci. 2017;6, 255-61.

<https://doi.org/10.1016/j.jshs.2017.04.01>

14. Bisciotti GN, Volpi P, Amato M, Alberti G, Allegra F, Aprato A, et al. Italian consensus conference on guidelines for conservative treatment on lower limb muscle injuries in athlete. BMJ Open Sport Exerc Med. 2018;4:e000323.

<https://doi.org/10.1136/bmjsem-2017-000323>

15. Cohen SB, Towers JD, Zoga A, Irrgang JJ, Makda J, Deluca PF, et al. Hamstring Injuries in Professional Football Players. Sports Health. 2011;3:423-30.

<https://doi.org/10.1177/1941738111403107>

16. Pollock N, James SLJ, Lee JC, Chakraverty R. British athletics muscle injury classification: a new grading system. Br J Sports Med. 2014;48:1347-51.

<https://doi.org/10.1136/bjsports-2013-093302>

17. Tscholl P, Meynard T, Le Thanh N, Neroladaki A. Diagnostics and classification of muscle injuries in sports. Swiss Sports Exerc Med. 2018;67(1):8-15.

<https://sgsm.ch/fileadmin/user_upload/Zeitschrift/66-2018-1/1-2018_1_Tscholl.pdf>

18. Valle X, Malliaropoulos N, Párraga Botero JD, Bikos G, Pruna R, Mónaco M, et al. Hamstring and other thigh injuries in children and young athletes. Scand. J Med Sci Sports. 2018;28(12):2630-7.

<https://doi.org/10.1111/sms.13282>

19. Valle X, Mechó S, Pruna R, Pedret C, Isern J, Monllau JC, et al. The MLG-R muscle injury classification for hamstrings. Examples and guidelines for its use. Apunts Med Esport. 2019;54(202):73–9.

<https://www.apunts.org/en-the-mlg-r-muscle-injury-classification-articulo-S1886658118300422>

20. Balius R, Blasi M, Pedret C, Alomar X, Peña-Amaro J, Vega JA, et al. A histoarchitectural approach to skeletal muscle injury. Searching for a common nomenclature. Orthop J Sports Med. 2020;8(3): 2325967120909090.

<https://doi.org/10.1177/2325967120909090>

Tabla 1.- Sistemas de Clasificación de enfermedades más utilizados)1-4,7-9

| **Denominación** | **Institución** | **Año** |
| --- | --- | --- |
| International Classification of Diseases (ICD-10) | World Health | 1990 |
| Injury Surveillance System (ISS) | National Collegiate Athletic Association (NCAA) | 1982 |
| Sport Medicine Diagnostic Coding System (SMDCS) | Canadian Intercollegiate Sport Injury Registry | 1991 |
| International Olympic Committee’s Injury Surveillance System | International Olympic Committee | 2008 |
| Australian Sports Injury Data Dictionary (ASIDD) | Sports Medicine Australia (SMA) | 1998 |
| Australian National Minimum Dataset for Injury Surveillance (NDS-IS) | Australia | 1990 |
| Orchard Sports Injury Classification System (OSICS-10) | Elite Australian Football | 1992 |
| The National Football League’s (NFL) Injury Surveillance System | National Football League | 1980 |
| Annual Injury Survey | Australian Football League (AFL) | 1993 |
| Injury Surveillance Database | Fairfax County Public School System | 1999 |
| Fédération Internationale de Football Association Surveillance System | Fédération Internationale de Football Association (FIFA) | 2007 |
| The Cricket Australia Injury Survey | Cricket Australia Sports Science Medicine | 2006 |
| UEFA Champions League Injury Study | Union of European Football Associations (UEFA) | 2001 |
| The Norwegian Professional Football League Injury Reporting System | Norwegian Professional Football League | 2002 |
| The England Professional Rugby Injury Surveillance Project | England Professional Rugby (RFU) | 2002 |
| The National High School Sports-Related Injury Surveillance System | National High School (USA) | 2005 |
| International Ski Federation Injury Surveillance System | International Ski Federation (FIS) | 2006 |
| International Association of Athletics Federations Surveillance System | International Association of Athletics Federations (IAAF) | 2007 |
| International Olympic Committee Injury Surveillance System for Multi-Sports Events | International Olympic Committee | 2007 |
| CORE-AT Electronic Medical Record and Injury Surveillance System | Athletic Training Practice-Based Research Network (AT-PBRN) | 2009 |
| The Major League Baseball Injury Surveillance System | Major League Baseball | 2010 |

Tabla 2. Principales deficiencias de los sistemas de clasificación de lesiones deportivas.

| **Deficiencias** |
| --- |
| Diversas definiciones del concepto de lesión deportiva |
| No aplicación inmediata a la práctica deportiva |
| Observador dependiente |
| Cumplimentación complicada o farragosa |
| No orientadas al tratamiento de la lesión |
| Unidimensionales, descriptivas de la lesión |
| No inclusión de datos sobre funcionalidad |
| Ausencia de datos en deportistas aficionados |
| Deficiente calidad de los datos |
| Ninguno específico de lesiones femeninas o infantiles |
| No multidisciplinares |
| No inclusión de datos complementarios (Crónico / Agudo, Gravedad, Afectación espectadores, Deportes no reglados, Deportistas jóvenes, Recidiva, Lesiones muy graves atendidas hospitalariamente, etc.) |

Tabla 3. Códigos propuestos para señalar la repercusión funcional de la lesión.

| **Código Propuesto** | **Repercusión Funcional de la lesión** |
| --- | --- |
| 0 | Sin Afectación Funcional |
| 1 | Limita Actividad Deportiva |
| 2 | Impide Actividad Deportiva |
| 3 | Limita Actividades Vida Cotidiana |
